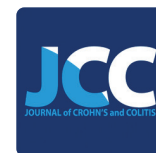

Original Article

# Occurrence of Anaemia in the First Year of Inflammatory Bowel Disease in a European Population-based Inception Cohort—An ECCO-EpiCom Study

Johan Burisch,<sup>a</sup> Zsuzsanna Vegh,<sup>b</sup> Konstantinos H. Katsanos,<sup>c</sup> Dimitrios K. Christodoulou,<sup>c</sup> Daniela Lazar,<sup>d</sup> Adrian Goldis,<sup>d</sup> Colm O'Morain,<sup>e</sup> Alberto Fernandez,<sup>f</sup> Santos Pereira,<sup>g</sup> Sally Myers,<sup>h</sup> Shaji Sebastian,<sup>h</sup> Natalia Pedersen,<sup>i</sup> Jóngerð Olse,<sup>j</sup> Kári Rubek Nielsen,<sup>j</sup> Doron Schwartz,<sup>k</sup> Selwyn Odes,<sup>k</sup> Sven Almer,<sup>l,m</sup> Jonas Halfvarson,<sup>n</sup> Niksa Turk,<sup>o</sup> Silvja Cukovic-Cavka,<sup>o</sup> Inna Nikulina,<sup>p</sup> Elena Belousova,<sup>p</sup> Dana Duricova,<sup>q</sup> Martin Bortlik,<sup>q,r</sup> Olga Shonová,<sup>s</sup> Riina Salupere,<sup>t</sup> Louisa Barros,<sup>u</sup> Fernando Magro,<sup>v,w,x</sup> Laimas Jonaitis,<sup>y</sup> Limas Kupcinskas,<sup>y</sup> Svetlana Turcan,<sup>z</sup> Ioannis Kaimakliotis,<sup>aa</sup> Karin Ladefoged,<sup>bb</sup> Karen Kudsk,<sup>cc</sup> Vibeke Andersen,<sup>cc,dd,ee</sup> Ida Vind,<sup>ff</sup> Niels Thorsgaard,<sup>gg</sup> Pia Oksanen,<sup>hh</sup> Pekka Collin,<sup>hh</sup> Giulia Dal Piaz,<sup>ii,jj</sup> Alessia Santini,<sup>jj,kk</sup> Ola Niewiadomski,<sup>ll</sup> Sally Bell,<sup>ll</sup> Bjørn Moum,<sup>mm</sup> Naila Arebi,<sup>nn</sup> Jens Kjeldsen,<sup>oo</sup> Katrine Carlsen,<sup>pp</sup> Ebbe Langholz,<sup>qq</sup> Peter Laszlo Lakatos,<sup>b</sup> Pia Munkholm,<sup>a</sup> Lars Ulrik Gerdes,<sup>rr</sup> Jens Frederik Dahlerup<sup>ss</sup>; for the EpiCom study group

<sup>a</sup>Department of Gastroenterology, North Zealand University Hospital, Frederikssund, Denmark <sup>b</sup>1st Department of Medicine, Semmelweis University, Budapest, Hungary <sup>c</sup>1st Division of Internal Medicine and Hepato-Gastroenterology Unit, University Hospital, Ioannina, Greece <sup>d</sup>Clinic of Gastroenterology, University of Medicine 'Victor Babes', Timisoara, Romania <sup>e</sup>Department of Gastroenterology, Adelaide and Meath Hospital, TCD, Dublin, Ireland <sup>f</sup>Department of Gastroenterology, POVISA Hospital, Vigo, Spain <sup>g</sup>Department of Gastroenterology, Instituto de Investigación Sanitaria Galicia Sur, Estrutura Organizativa de Xestión Integrada de Vigo, Vigo, Spain <sup>h</sup>IBD Unit, Hull & East Yorkshire NHS Trust, Hull, UK <sup>i</sup>Gastroenterology Department, Slagelse Hospital, Slagelse, Denmark <sup>j</sup>Medical Department, National Hospital of the Faroe Islands, Torshavn, Faroe Islands <sup>k</sup>Department of Gastroenterology and Hepatology, Soroka Medical Center and Ben Gurion University of the Negev, Beer Sheva, Israel <sup>l</sup>Department of Medicine, Solna, Karolinska Institutet, Stockholm, Sweden <sup>m</sup>Center for Digestive Diseases, Karolinska University Hospital, Stockholm, Sweden <sup>n</sup>Department of Gastroenterology, Faculty of Medicine and Health, Örebro University, Örebro, Sweden <sup>o</sup>Division of Gastroenterology and Hepatology, University Hospital Center Zagreb, Zagreb, Croatia <sup>p</sup>Department of Gastroenterology, Moscow Regional Research Clinical Institute, Moscow, Russian Federation <sup>q</sup>IBD Clinical and Research Centre ISCARE, Charles University, Prague, Czech Republic <sup>r</sup>Institute of Pharmacology, 1st Medical Faculty, Charles University, Prague, Czech Republic <sup>s</sup>Gastroenterology Department, Hospital České Budějovice, České Budějovice, Czech Republic <sup>t</sup>Division of Gastroenterology, Tartu University Hospital, Tartu, Estonia <sup>u</sup>Department of Medicine, Hospital de Vale de Sousa, Porto, Portugal <sup>v</sup>Department of Gastroenterology, Hospital de São João, Porto, Portugal <sup>w</sup>Institute of Pharmacology and Therapeutics, Oporto Medical School, Porto, Portugal <sup>x</sup>Institute for Molecular and Cell Biology, University of Porto, Porto, Portugal <sup>y</sup>Institute for Digestive

Research, Lithuanian University of Health Sciences, Kaunas, Lithuania <sup>2</sup>Department of Gastroenterology, State University of Medicine and Pharmacy of the Republic of Moldova, Chisinau, Republic of Moldova <sup>3a</sup>Nicosia private practice, Nicosia, Cyprus <sup>3b</sup>Medical Department, Dronning Ingrid's Hospital, Nuuk, Greenland <sup>4c</sup>Institute of Molecular Medicine, University of Southern Denmark, Odense, Denmark <sup>4d</sup>Laboratory Center, Hospital of Southern Jutland, Aabenraa, Denmark <sup>4e</sup>Institute of Regional Health Research, University of Southern Denmark, Odense, Denmark <sup>5</sup>Gastrounit, Medical Division, Copenhagen University Hospital Hvidovre, Hvidovre, Denmark <sup>6a</sup>Department of Medicine, Herning Central Hospital, Herning, Denmark <sup>6b</sup>Department of Gastroenterology and Alimentary Tract Surgery, Tampere University Hospital, Tampere, Finland <sup>7</sup>Dipartimento Medicina Specialistica Gastroenterologia ed Endoscopia Digestiva, Ospedale Morgagni — Pierantoni, Forlì, Italy <sup>8</sup>On behalf of the EpiCom Northern Italy centre based in Crema & Cremona, Firenze, Forlì, Padova, and Reggio Emilia, Italy <sup>9</sup>Gastroenterology Unit, Careggi Hospital, Florence, Italy <sup>10</sup>Department of Gastroenterology, St Vincent's Hospital, Melbourne, VIC, Australia <sup>11</sup>Department of Gastroenterology, Oslo University Hospital, Oslo, Norway <sup>12</sup>St Mark's Hospital, Imperial College London, London, UK <sup>13</sup>Department of Medical Gastroenterology, Odense University Hospital, Odense, Denmark <sup>14</sup>Department of Pediatrics, Hvidovre University Hospital, Hvidovre, Denmark <sup>15</sup>Department of Gastroenterology, Herlev University Hospital, Herlev, Denmark <sup>16</sup>Center for Quality, Region of Southern Denmark, Denmark <sup>17</sup>Department of Hepatology and Gastroenterology, Aarhus University Hospital, Aarhus, Denmark

Corresponding author: Johan Burisch, MD, PhD, Department of Gastroenterology, North Zealand University Hospital, Frederikssund, Denmark, Frederikssundvej 30, 3600 Frederikssund, Denmark. Email: [burisch@dadlnet.dk](mailto:burisch@dadlnet.dk)

## Abstract

**Background and aims:** Anaemia is an important complication of inflammatory bowel disease [IBD]. The aim of this study was to determine the prevalence of anaemia and the practice of anaemia screening during the first year following diagnosis, in a European prospective population-based inception cohort.

**Methods:** Newly diagnosed IBD patients were included and followed prospectively for 1 year in 29 European and one Australian centre. Clinical data including demographics, medical therapy, surgery and blood samples were collected. Anaemia was defined according to the World Health Organization criteria.

**Results:** A total of 1871 patients (Crohn's disease [CD]: 686, 88%; ulcerative colitis [UC]: 1,021, 87%; IBD unclassified [IBDU] 164, 81%) were included in the study. The prevalence of anaemia was higher in CD than in UC patients and, overall, 49% of CD and 39% of UC patients experienced at least one instance of anaemia during the first 12 months after diagnosis. UC patients with more extensive disease and those from Eastern European countries, and CD patients with penetrating disease or colonic disease location, had higher risks of anaemia. CD and UC patients in need of none or only mild anti-inflammatory treatment had a lower risk of anaemia. In a significant proportion of patients, anaemia was not assessed until several months after diagnosis, and in almost half of all cases of anaemia a thorough work-up was not performed.

**Conclusions:** Overall, 42% of patients had at least one instance of anaemia during the first year following diagnosis. Most patients were assessed for anaemia regularly; however, a full anaemia work-up was frequently neglected in this community setting.

**Key Words:** anaemia, inflammatory bowel disease, prevalence

## 1. Introduction

Anaemia is a systemic complication considered as an extra-intestinal manifestation of the inflammatory bowel diseases [IBD] Crohn's disease [CD] and ulcerative colitis [UC]. The two most common forms of anaemia in IBD patients are iron deficiency anaemia [IDA] and anaemia of chronic disease [ACD]<sup>1,2</sup>; often, however, the two conditions overlap. Approximately one in five IBD patients is anaemic at any given time,<sup>2,3</sup> and anaemia affects patients' perceived health-related quality of life [HRQoL], their ability to work, and cognitive functions,<sup>4,5</sup> as well as increasing their health care costs.<sup>6</sup> Anaemia

also provides an indicator of the global quality of care and inflammation control of IBD patients. Accordingly, international guidelines recommend that IBD patients be checked for anaemia at diagnosis.<sup>7,8</sup>

The majority of studies on anaemia in IBD originate from the time before biological therapy was available, and very few population-based inception cohorts have reported on the occurrence of anaemia at diagnosis and during follow-up.<sup>9-11</sup> The European Crohn's and Colitis Organisation's [ECCO] Epidemiological Committee [EpiCom] study is a prospective population-based cohort of unselected IBD patients, for investigating the occurrence, disease course, and prognosis of IBD in Europe.<sup>12</sup> The EpiCom collaboration has

previously documented differences in the incidence of IBD across Europe, and currently unchanged initial disease course when compared with the pre-biological era, despite an earlier and more frequent use of biological agents and immuno-modulating therapy.<sup>13–16</sup>

Using the EpiCom cohort, the aim of the current study was to investigate: [i] the prevalence and course of anaemia during the first year after diagnosis; [ii] the practice of anaemia screening and follow-up; [iii] and any differences between Eastern and Western European centres in terms of screening for and the prevalence of anaemia.

## 2. Material and Methods

### 2.1. Study setting

In 2010, the EpiCom study collaboration launched a population-based prospective inception cohort of incident IBD patients diagnosed within a 1-year inclusion period in 31 centres from eight Eastern and 14 Western European countries [hereafter referred to as the EpiCom 2010 cohort; Appendix I].<sup>13</sup> In total, 1560 IBD patients were recruited within well-described geographical areas covering a total background population of 10.1 million [3.3 million in Eastern and 6.8 million in Western Europe]. A total of 1442 IBD patients were followed up prospectively. Of the centres in the EpiCom 2010 cohort, 14 European centres [five from Eastern and nine from Western European countries], along with one centre in Australia, continued to include incident patients in 2011<sup>14</sup> [the EpiCom 2011 cohort]; a total of 709 IBD patients were included. For the purpose of this study, the two cohorts were merged. The Australian centre was grouped with Western European centres. A list of centres in both cohorts is included in Supplementary data, available at *ECCO-JCC* online.

The methodologies of the EpiCom 2010 and EpiCom 2011 cohort studies are identical.<sup>13,14</sup> Participation in the study required a well-defined primary catchment area with up-to-date population data, including age and gender distribution. Similarly, participation required an established network of gastroenterologists, colorectal surgeons, and general practitioners [GPs] within the uptake area, who were contacted twice during the inclusion period to ensure complete coverage and recruitment of patients. Case ascertainment methods, diagnostic criteria for case definition, time period of inclusion, and patient data recorded were all standardised.

### 2.2. Patient population

Incident patients diagnosed with IBD during the inclusion periods [1 January to 31 December 2010 and 1 January to 31 December 2011], aged 15 years or older, and living in the predefined catchment areas at the time of diagnosis, were prospectively included in the EpiCom cohorts. The diagnosis of CD, UC, or IBDU was based on the *Copenhagen Diagnostic Criteria*<sup>17–19</sup> [see Supplementary data, available at *ECCO-JCC* online]. Fulfilment of these criteria was assessed by the participating physicians and gastroenterologists. The date of inclusion was the date of diagnosis. Disease extent for UC, as well as disease location and behaviour for CD, were defined according to the *Montreal Classification*.<sup>20</sup>

Patients were followed prospectively every third month from diagnosis and throughout the follow-up period. Data regarding demographics, disease activity, blood samples, medical therapy, surgery, hospitalisation, disease classification, cancers, and deaths were collected and entered prospectively in the web-based inception cohort EpiCom database.<sup>21</sup> Blood samples were taken at the treating physician's discretion. Measures for securing data validity have been thoroughly described elsewhere.<sup>12</sup> In short, data validity was secured

by built-in control and validation tests, locked diagnostic criteria in the database, manual data standardisation, and random audits of case ascertainment and data quality.

### 2.3. Classifications and definitions

Anaemia was defined according to the World Health Organization [WHO] criteria as a haemoglobin [Hgb] level of less than 13 g/dL in men and an Hgb level of less than 12 g/dL in non-pregnant females.<sup>22</sup> Anaemia was classified using both the serum ferritin and the C-reactive protein [CRP] levels, in accordance with the current ECCO guidelines.<sup>23</sup>

- Pure iron deficiency anaemia [IDA] was defined as anaemia with a ferritin level of < 30 µg/L and CRP < the upper limit of normality at each site.
- Pure anaemia of chronic disease [ACD] was defined as anaemia with a ferritin level of > 100 µg/L and CRP > the upper limit of normality at each site.
- Combined anaemia [mixed IDA and ACD] was defined as anaemia with a ferritin level of < 100 µg/L and CRP > the upper limit of normality at each site.

Treatment options were grouped into five levels of ascending therapeutic potency: 5-aminosalicylates [5-ASA] [oral and/or topical 5-ASA treatment ± topical steroids], glucocorticosteroids [GCS] [oral steroids ± 5-ASA or topical steroids], immunomodulators [azathioprine, 6-mercaptopurine, cyclosporine or methotrexate ± steroids], biologics [infliximab or adalimumab in combination with any of the above], and surgery [regardless of medical treatment preceding surgery]. Surgery was defined as total or subtotal colectomy for UC and small or large bowel resections for CD due to IBD, and perianal surgery was excluded.

### 2.4. Statistical analysis

Statistical analyses were performed using SAS software v. 9.4. Demographics and disease classification between groups were compared with a chi-square test. Results for continuous variables are expressed as the median [interquartile range] unless otherwise stated. Blood samples taken between 30 days before and after the time of diagnosis were used in order to assess anaemia status at the time of diagnosis. Similarly, a window of 30 days before and 3 months after 1 year since the date of diagnosis was used in order to assess anaemia status after 1 year, to account for variations in the 12-month period. If there was more than one set of blood samples within any period of the aforementioned time windows, the samples closest to the date of diagnosis and its 12-month follow-up were used.

Predictors of anaemia were analysed using a logistic regression model including age, gender, geographical region, smoking status at diagnosis, disease extent in UC, disease location and behaviour in CD, extra-intestinal manifestations at diagnosis, and highest treatment level reached during follow-up, all as independent variables.

In patients with Hgb measurements at diagnosis and 1-year follow-up, the association of the aforementioned covariates with the relative change [%] in Hgb was analysed using linear normal analysis of covariance [ANCOVA]. In patients with Hgb measurements available after more than 6 months of follow-up, the final Hgb value during follow-up was analysed using ANCOVA, while controlling for the aforementioned covariates. Finally, we included all available Hgb measures in a repeated measures analysis of variance [ANOVA] of the final Hgb value, again while controlling for the covariates. A *p*-value < 0.05 was considered statistically significant.

## 2.5. Ethical considerations

The study was approved by the local ethical committees according to local regulations.

## 3. Results

### 3.1. Patient population

Of 2151 incident IBD patients, 157 [7%] were lost to follow-up immediately after diagnosis and 123 [6%] patients did not have blood samples available for analysis. Thus, a total of 1871 [87%] patients had HgB levels measured during the follow-up period and were eligible for inclusion [Figure 1](#). These patients submitted a total of 6895 blood samples for analysis. The proportion of Eastern European patients from the total cohort with HgB measurements available for analysis was higher than that of Western European patients [East: 417 [96%]; West: 1454 [85%],  $p < 0.05$ ]. Patient characteristics are shown in [Table 1](#). Only the disease location in CD differed significantly between Eastern and Western European patients [ $p < 0.05$ ].

### 3.2. Measurements of haemoglobin during follow-up

Overall, IBD patients had a median of three HgB measurements taken (interquartile range [IQR]: 2–5) during follow-up (CD 4 [IQR: 2–5]; UC 3 [IQR 2–5]; IBDU 3 [IQR 2–5]). These frequencies did not differ between Eastern and Western European patients. A total of 1086 [58%] (Eastern Europe: 307 [74%]; Western Europe: 779 [54%]) patients had HgB measured at the time of diagnosis, and this proportion increased to 1703 [91%] (Eastern Europe: 403 [97%]; Western Europe: 1300 [89%] [ $p =$  nonsignificant]) within 6 months

of diagnosis. No difference was found between CD and UC patients ( $p =$  nonsignificant [NS]). In total, 1109 [59%] patients had HgB measured at the 1-year follow-up, and 601 [32%] patients had HgB measured both at diagnosis and at 1-year follow-up [Figure 1](#).

### 3.3. Frequency and type of anaemia

Overall during the follow-up period, 794 [42%] had at least one instance of anaemia (Eastern Europe: 201 [48%]; Western Europe 593 [41%]). Specifically, this was the case in 332 [49%] CD patients (Eastern Europe: 78 [47%]; Western Europe 254 [49%]) and 402 [39%] UC patients (Eastern Europe: 123 [50%]; Western Europe 279 [36%]). In 1791 [26%] of 6895 HgB measurements anaemia was found, and of those 194 [11%] were iron deficiency anaemia [IDA], 203 [11%] were anaemia of chronic disease [ACD], and 925 [52%] did not have results sufficient to define their anaemia subtype.

The prevalence of anaemia and anaemia subtypes in CD and UC patients at diagnosis and at 1-year follow-up is shown in [Table 2](#). Overall, at diagnosis the prevalence of anaemia was 45% [ $n = 179$ ] in CD, 34% [ $n = 196$ ] in UC, and 27% [ $n = 28$ ] in IBDU patients. At 1-year follow-up, the prevalence of anaemia was 18% [ $n = 75$ ] in CD, 17% [ $n = 100$ ] in UC, and 11% [ $n = 10$ ] in IBDU patients. Regarding predictors of anaemia, logistic regression analysis found that CD patients had a higher risk of anaemia at diagnosis when compared with UC and IBDU patients (UC vs CD odds ratio [OR]: 0.6, 95% confidence interval [CI]: 0.5–0.8; IBDU vs CD OR: 0.5, 95% CI: 0.3–0.8). Predictors of anaemia in CD and UC patients are shown in [Table 3](#).

Among the patients with HgB values available at diagnosis, there were no differences in clinical or sociodemographic characteristics for CD and UC when compared with the total cohort. At 1-year

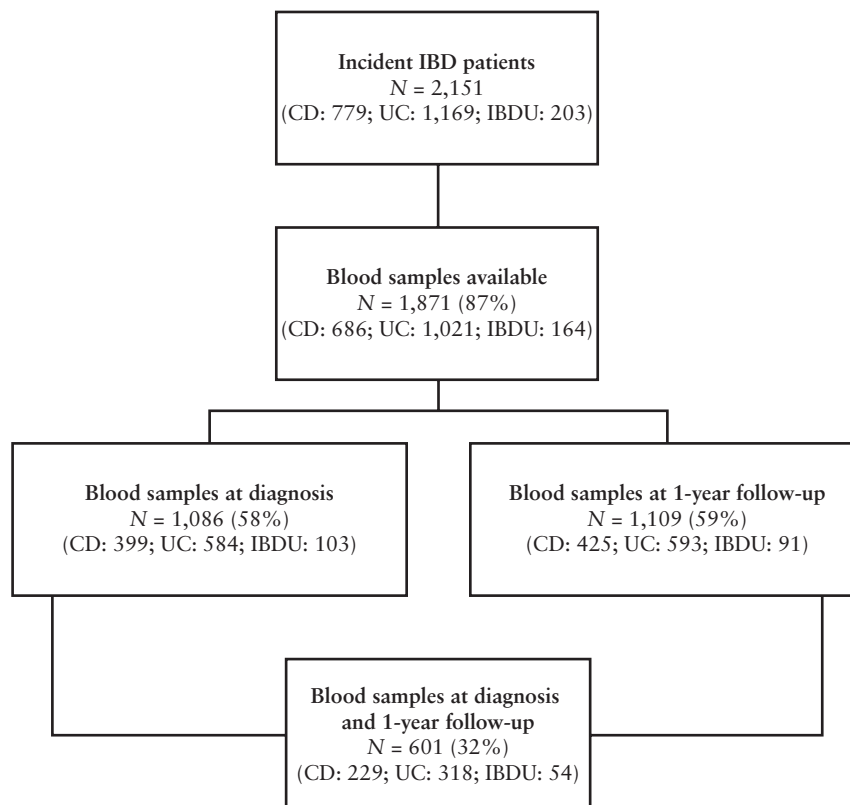

**Figure 1.** Flowchart of the study population.

**Table 1.** Characteristics of 1871 incident inflammatory bowel disease patients from the EpiCom-cohort

|                                              | Western European centres |               |               | Eastern European centres |               |              |
|----------------------------------------------|--------------------------|---------------|---------------|--------------------------|---------------|--------------|
|                                              | CD                       | UC            | IBDU          | CD                       | UC            | IBDU         |
| No. of patients                              | 520 [36%]                | 777 [53%]     | 157 [11%]     | 166 [40%]                | 244 [59%]     | 7 [2%]       |
| Male                                         | 280 [54%]                | 441 [57%]     | 78 [50%]      | 88 [53%]                 | 130 [53%]     | 5 [71%]      |
| Female                                       | 240 [46%]                | 336 [43%]     | 79 [50%]      | 78 [47%]                 | 114 [47%]     | 2 [29%]      |
| Age at diagnosis, years                      | 37 [16–89]               | 39 [15–89]    | 38 [17–78]    | 38 [15–78]               | 35 [15–87]    | 28 [20–34]   |
| Median time to diagnosis, months             | 4.0 [0–31 yr]            | 2.5 [0–30 yr] | 2.6 [0–30 yr] | 3.2 [0–10 yr]            | 2.2 [0–26 yr] | 2.0 [0–3 yr] |
| Extra-intestinal manifestations at diagnosis | 70 [13%]                 | 59 [8%]       | 22 [14%]      | 26 [16%]                 | 25 [10%]      | 1 [14%]      |
| Smoking status at diagnosis                  |                          |               |               |                          |               |              |
| Never smoker                                 | 223 [44%]                | 395 [53%]     | 77 [52%]      | 68 [42%]                 | 140 [59%]     | 4 [57%]      |
| Current smoker                               | 177 [35%]                | 78 [11%]      | 17 [11%]      | 56 [35%]                 | 24 [10%]      | 3 [43%]      |
| Former smoker                                | 109 [21%]                | 262 [36%]     | 55 [37%]      | 38 [23%]                 | 75 [31%]      | 0 [0%]       |
| Disease extent                               |                          |               |               |                          |               |              |
| E1: Proctitis                                |                          | 156 [20%]     |               |                          | 21 [21%]      |              |
| E2: Left-sided                               |                          | 314 [41%]     |               |                          | 112 [46%]     |              |
| E3: Extensive colitis                        |                          | 306 [39%]     |               |                          | 81 [33%]      |              |
| Disease location*                            |                          |               |               |                          |               |              |
| L1: Terminal ileum                           | 148 [29%]                |               |               | 63 [38%]                 |               |              |
| L2: Colon                                    | 141 [27%]                |               |               | 31 [19%]                 |               |              |
| L3: Terminal ileum + colon                   | 110 [21%]                |               |               | 43 [26%]                 |               |              |
| L4: Upper GI                                 | 35 [7%]                  |               |               | 3 [2%]                   |               |              |
| L1+L4                                        | 34 [7%]                  |               |               | 10 [6%]                  |               |              |
| L2+L4                                        | 15 [3%]                  |               |               | 7 [4%]                   |               |              |
| L3+L4                                        | 32 [6%]                  |               |               | 8 [5%]                   |               |              |
| Disease behaviour                            |                          |               |               |                          |               |              |
| B1: non-stricturing, non-penetrating         | 331 [64%]                |               |               | 105 [64%]                |               |              |
| B2: stricturing                              | 95 [18%]                 |               |               | 35 [21%]                 |               |              |
| B3: penetrating                              | 44 [8%]                  |               |               | 14 [8%]                  |               |              |
| B1p: B1 + perianal                           | 39 [8%]                  |               |               | 6 [4%]                   |               |              |
| B2p: B2 + perianal                           | 6 [1%]                   |               |               | 2 [1%]                   |               |              |
| B3p: B3 + perianal                           | 5 [1%]                   |               |               | 3 [2%]                   |               |              |
| Highest level of treatment during follow-up  |                          |               |               |                          |               |              |
| No treatment                                 | 27 [5%]                  | 27 [3%]       | 0 [0%]        | 3 [2%]                   | 2 [1%]        | 0 [0%]       |
| 5-ASA                                        | 78 [15%]                 | 395 [51%]     | 88 [56%]      | 41 [25%]                 | 164 [67%]     | 4 [57%]      |
| GCS                                          | 90 [17%]                 | 185 [24%]     | 33 [21%]      | 30 [18%]                 | 40 [16%]      | 2 [29%]      |
| Immunomodulators                             | 154 [30%]                | 118 [15%]     | 21 [13%]      | 57 [34%]                 | 29 [12%]      | 1 [14%]      |
| Biological therapy                           | 97 [19%]                 | 31 [4%]       | 10 [6%]       | 12 [7%]                  | 6 [2%]        | 0 [0%]       |
| Surgery                                      | 74 [14%]                 | 21 [3%]       | 5 [3%]        | 23 [14%]                 | 3 [1%]        | 0 [0%]       |

\*Differences between geographical regions  $p < 0.05$ .

CD, Crohn's disease; UC, ulcerative colitis; IBDU, inflammatory bowel disease unclassified; yr, years; GI, gastrointestinal; GCS, glucocorticosteroids; 5-ASA, 5-aminosalicylic acid.

**Table 2.** Prevalence of anaemia in Crohn's disease and ulcerative colitis patients at diagnosis [ $n = 983$ ] and at 1-year follow-up [ $n = 1018$ ].

|                 | Crohn's disease |                |                |                | Ulcerative colitis |                |                |                |
|-----------------|-----------------|----------------|----------------|----------------|--------------------|----------------|----------------|----------------|
|                 | Diagnosis       |                | Follow-up      |                | Diagnosis          |                | Follow-up      |                |
|                 | Eastern Europe  | Western Europe | Eastern Europe | Western Europe | Eastern Europe     | Western Europe | Eastern Europe | Western Europe |
| Anaemia overall | 52 [46%]        | 127 [44%]      | 19 [25%]       | 56 [16%]       | 72 [38%]           | 124 [31%]      | 32 [27%]*      | 68 [14%]       |
| Iron deficiency | 6 [12%]         | 3 [2%]         | 2 [11%]*       | 7 [13%]        | 12 [17%]           | 9 [7%]         | 3 [9%]*        | 24 [35%]       |
| Chronic disease | 14 [27%]        | 30 [24%]       | 1 [5%]*        | 4 [7%]         | 12 [17%]           | 13 [10%]       | 4 [13%]*       | 5 [7%]         |
| Mixed anaemia   | 12 [23%]        | 39 [31%]       | 5 [25%]*       | 6 [11%]        | 20 [28%]           | 30 [24%]       | 0 [0%]*        | 7 [10%]        |
| Other anaemia   | 2 [4%]          | 17 [13%]       | 0 [0%]*        | 8 [14%]        | 5 [7%]             | 16 [13%]       | 4 [13%]*       | 7 [10%]        |
| Unclassified    | 18 [35%]        | 38 [30%]       | 11 [58%]*      | 31 [55%]       | 23 [32%]           | 56 [45%]       | 21 [66%]*      | 25 [37%]       |

\*Differences between geographical regions  $p < 0.05$ .

follow-up, in CD the proportion of patients receiving immunomodulators or biological therapy was larger than that seen in the cohort as a whole. In UC, the proportion of patients with extensive colitis,

as well as the proportion of patients receiving corticosteroids, immunomodulators, or biological therapy, were larger than those seen in the cohort as a whole [data not shown].

**Table 3.** Predictors of anaemia in Crohn's disease and ulcerative colitis patients at diagnosis [ $n = 983$ ], 1-year follow-up [ $n = 1018$ ] and overall during follow-up [ $n = 1707$ ].

|                                                | Diagnosis                       |                                    | At 1-year follow-up             |                                    | Any time during follow-up       |                                    |
|------------------------------------------------|---------------------------------|------------------------------------|---------------------------------|------------------------------------|---------------------------------|------------------------------------|
|                                                | Crohn's disease<br>[OR, 95% CI] | Ulcerative colitis<br>[OR, 95% CI] | Crohn's disease<br>[OR, 95% CI] | Ulcerative colitis<br>[OR, 95% CI] | Crohn's disease<br>[OR, 95% CI] | Ulcerative colitis<br>[OR, 95% CI] |
| Number of patients                             | 399                             | 584                                | 425                             | 593                                | 686                             | 1,021                              |
| Age [per year]                                 | 0.99 [0.98–1.00]                | 1.00 [0.99–1.01]                   | 1.02 [1.00–1.03]                | 1.01 [0.99–1.02]                   | 1.00 [0.99–1.01]                | 1.00 [0.99–1.01]                   |
| Female gender                                  | 1.15 [0.75–1.77]                | 1.18 [0.82–1.71]                   | 0.89 [0.52–1.54]                | 1.13 [0.71–1.79]                   | 1.36 [0.97–1.92]                | 1.21 [0.91–1.62]                   |
| Coming from Eastern Europe                     | 1.15 [0.71–1.85]                | 1.46 [1.00–2.14]                   | 1.26 [0.65–2.47]                | 2.66 [1.60–4.45]                   | 1.00 [0.67–1.50]                | 2.36 [1.70–3.27]                   |
| Smoking status                                 |                                 |                                    |                                 |                                    |                                 |                                    |
| Current                                        | 1.15 [0.71–1.88]                | 0.88 [0.48–1.63]                   | 0.89 [0.47–1.67]                | 0.44 [0.15–1.29]                   | 0.80 [0.54–1.19]                | 0.86 [0.53–1.39]                   |
| Former                                         | 1.53 [0.85–2.73]                | 1.04 [0.69–1.58]                   | 1.00 [0.50–2.02]                | 1.25 [0.77–2.05]                   | 1.06 [0.67–1.67]                | 1.12 [0.81–1.54]                   |
| Never                                          | Reference                       | Reference                          | Reference                       | Reference                          | Reference                       | Reference                          |
| No extra-intestinal manifestation at diagnosis | 1.08 [0.59–1.99]                | 1.41 [0.72–2.77]                   | 0.65 [0.31–1.37]                | 0.83 [0.39–1.74]                   | 0.73 [0.45–1.20]                | 1.07 [0.65–1.76]                   |
| Disease behaviour ± perianal                   |                                 |                                    |                                 |                                    |                                 |                                    |
| B3: penetrating                                | 3.47 [1.73–6.99]                | -                                  | 3.02 [1.11–8.26]                | -                                  | 2.73 [1.35–5.52]                | -                                  |
| B2: structuring                                | 2.13 [1.20–3.78]                | -                                  | 2.42 [1.23–4.76]                | -                                  | 1.42 [0.91–2.22]                | -                                  |
| B1: non-stricturing, non-penetrating           | Reference                       | -                                  | Reference                       | -                                  | Reference                       | -                                  |
| Disease location                               |                                 |                                    |                                 |                                    |                                 |                                    |
| L4: Upper GI [± L1-L3]                         | 1.98 [1.06–3.68]                | -                                  | 1.10 [0.50–2.43]                | -                                  | 0.97 [0.60–1.56]                | -                                  |
| L3: Terminal ileum + colon                     | 3.14 [1.69–5.84]                | -                                  | 1.77 [0.81–3.87]                | -                                  | 1.66 [1.03–2.69]                | -                                  |
| L2: Colon                                      | 5.14 [2.73–9.68]                | -                                  | 1.59 [0.72–3.53]                | -                                  | 2.50 [1.54–4.07]                | -                                  |
| L1: Terminal ileum                             | Reference                       | -                                  | Reference                       | -                                  | Reference                       | -                                  |
| Disease extent                                 |                                 |                                    |                                 |                                    |                                 |                                    |
| E3: Extensive colitis                          | -                               | 5.20 [2.82–9.59]                   | -                               | 1.28 [0.62–2.65]                   | -                               | 2.94 [1.89–4.57]                   |
| E2: Left-sided                                 | -                               | 3.60 [1.96–6.64]                   | -                               | 1.33 [0.66–2.71]                   | -                               | 2.40 [1.56–3.68]                   |
| E1: Proctitis                                  | -                               | Reference                          | -                               | Reference                          | -                               | Reference                          |
| Highest treatment level                        |                                 |                                    |                                 |                                    |                                 |                                    |
| No treatment                                   | -                               | -                                  | 0.00 [NA*]                      | 0.54 [0.07–4.47]                   | 0.12 [0.03–0.47]                | 0.05 [0.01–0.27]                   |
| 5-aminosalicylates                             | -                               | -                                  | 0.56 [0.15–2.05]                | 0.35 [0.08–1.52]                   | 0.25 [0.13–0.50]                | 0.16 [0.06–0.41]                   |
| Corticosteroids                                | -                               | -                                  | 1.73 [0.57–5.29]                | 0.50 [0.11–2.22]                   | 0.48 [0.25–0.91]                | 0.32 [0.13–0.81]                   |
| Immunomodulators                               | -                               | -                                  | 2.66 [0.98–7.23]                | 1.32 [0.30–5.83]                   | 0.97 [0.54–1.72]                | 0.71 [0.27–1.86]                   |
| Biological therapy                             | -                               | -                                  | 0.84 [0.26–2.70]                | 0.86 [0.15–4.89]                   | 0.90 [0.46–1.73]                | 1.01 [0.32–3.47]                   |
| Surgery [reference]                            | -                               | -                                  | Reference                       | Reference                          | Reference                       | Reference                          |

OR, odds ratio; 95% CI, 95% confidence interval; GI, gastrointestinal.

\*No cases of anaemia in this treatment group.

### 3.4. Change in haemoglobin value during follow-up

In total, 601 IBD patients had HgB measured both at diagnosis and at 1-year follow-up. Changes in anaemia status in CD and UC patients between diagnosis and 1-year follow-up are shown in Figure 2. Regarding CD, low HgB at diagnosis, female gender, penetrating or stricturing disease behaviour compared with non-stricturing, non-penetrating disease, and colonic or ileo-colonic location compared with ileal location, were associated with a relative increase in HgB value between diagnosis and 1-year follow-up [ $p < 0.05$ ]. In UC, only female gender was associated with a relative increase in HgB value between diagnosis and 1-year follow-up [ $p < 0.05$ ].

In order to analyse clinical factors associated with the final HgB value, a total of 6251 blood samples from 1707 CD and UC patients were included in the repeated measures analysis, and 1370 patients had at least one HgB measurement after 6 months of follow-up. Clinical factors associated with the final HgB value are shown in Table 4.

## 4. Discussion

We have described the prevalence of anaemia and the frequency of HgB assessment during the first year of disease in a European,

prospective, population-based inception cohort. Anaemia was found to be frequent, with almost half of CD patients, and 40% of UC patients, being anaemic at some point during the observation period. UC patients with more extensive disease, or those originating in Eastern European countries, along with CD patients with penetrating disease or colonic disease location, all had higher risks of anaemia. CD and UC patients in need of only mild treatment or none at all had a lower risk of anaemia. In a significant proportion of patients, HgB was not measured until several months after diagnosis, and in almost half of all cases of anaemia, a thorough work-up was not performed and so the type of anaemia was indeterminable.

CD and UC are frequently complicated by manifestations, such as anaemia, that may not be apparent to the physician or patient, but might have a major impact on patients' well-being and disease course. A European meta-analysis found that the overall prevalence of anaemia was 27% for CD and 21% for UC,<sup>3</sup> but the range of prevalence estimates depends on study type and subpopulation and can vary from 6% to 74%.<sup>9,24</sup> IBD patients with anaemia report a lower perception of HRQoL, carry higher health care costs,<sup>6,25</sup> and are at higher risk of CD-related complications or surgery.<sup>26</sup> Anaemia should therefore be considered a serious complication in IBD which necessitates adequate monitoring and treatment of the underlying

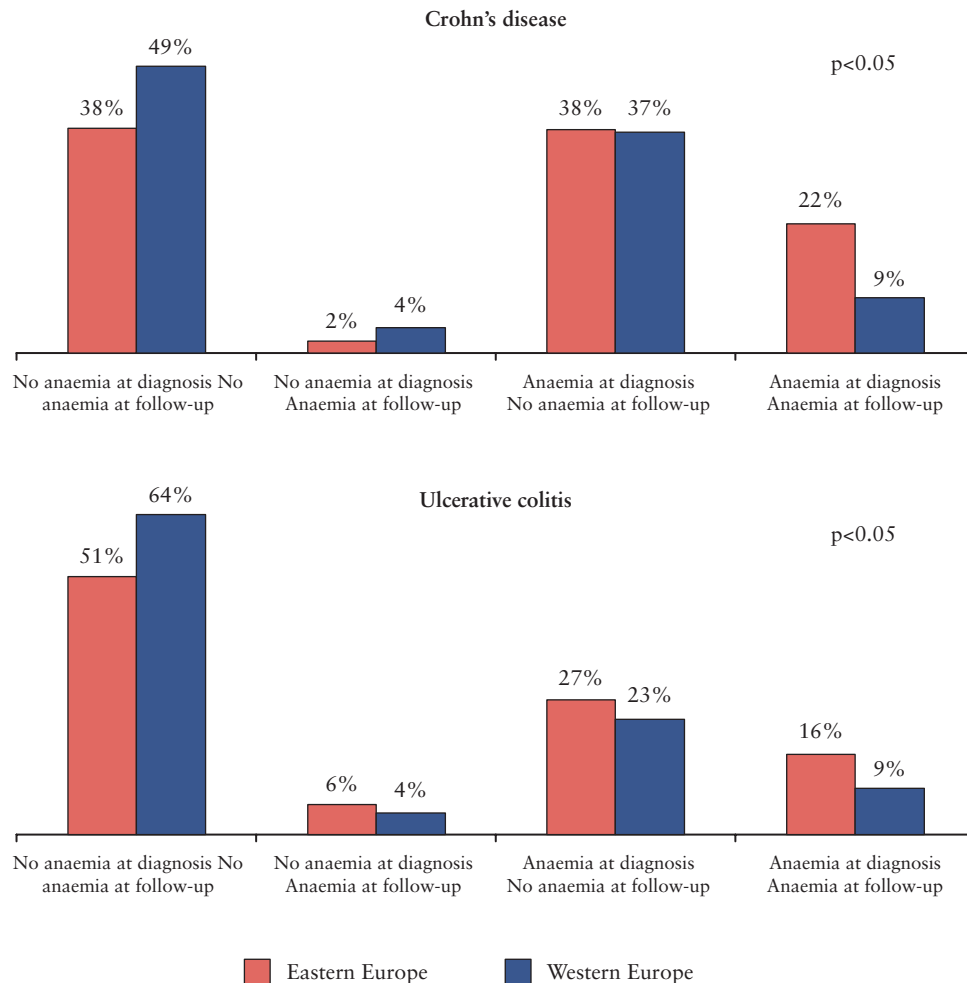

**Figure 2.** Change in anaemia status between diagnosis and 1-year follow-up in EpiCom cohort patients.

causes. Screening for anaemia at diagnosis and regular assessment for the presence of anaemia are therefore mandatory, according to guidelines.<sup>7,8,23</sup>

Surprisingly, in this unselected inception cohort representing real-life practices of IBD care of incident patients, we found that whereas the majority of patients had HgB measured three times during the 12-month observation period, a substantial number were not assessed until several months after diagnosis. Furthermore, serum ferritin was only determined occasionally and thus anaemia subtyping was not possible. No geographical difference regarding these observations was found. Iron deficiency in the absence of anaemia negatively affects HRQoL in IBD patients in remission,<sup>27</sup> further underlining the importance of regular anaemia work-ups. Our findings are somewhat in line with a German population-based cohort showing that 33% of patients with proven anaemia did not have further diagnostic work-ups performed.<sup>11</sup>

Our study found that approximately 40% of IBD patients had anaemia at any given time during the observation period, a proportion similar to that observed in previous studies.<sup>11,25</sup> However, although in our study the prevalence of anaemia in CD at the time of diagnosis was in accordance with previous studies, the prevalence in UC was higher.<sup>9,10</sup> At 1-year follow-up, the prevalence of anaemia in Western European patients was low and similar to other population-based cohorts, whereas Eastern European patients had higher prevalence rates. As only a selection of patients had HgB measured at

diagnosis or follow-up, the findings may be biased, as these patients were more likely to have received immunomodulators or biologics, or to have extensive colitis. Furthermore, the prevalence of IDA in our cohort was low, but data on anaemia subtypes from population-based cohorts are limited. A Scandinavian cross-sectional study found that 20% of patients had IDA,<sup>2</sup> and a German population-based cohort with rates of full anaemia work-up found that 38% of anaemia patients had IDA.<sup>11</sup> As many patients did not have full anaemia work-up performed the reported prevalence of IDA might be underestimated. Consistently with previous studies, we found that disease classification [having more extensive colitis and colonic CD location], as well as the need for more immunomodulators, biological therapy, and surgery, as surrogate markers for disease severity, to be a predictor of anaemia.<sup>9,10,28</sup>

Most data on anaemia from population-based cohorts originate in Western, rather than Eastern, Europe.<sup>29</sup> In this study, we found that Eastern European UC patients had a higher risk of anaemia than those from Western Europe. Patient characteristics, as well as short-term outcomes, did not differ between geographical regions in this cohort<sup>13,15</sup> despite differences in treatment strategies. Therefore, the present findings might indicate differences in awareness of anaemia across Europe, as well as in overall quality of IBD care, as we have no reason to believe the disease course is influenced by region.

The strength of the present study is the prospective population-based inclusion and follow-up of incident IBD patients diagnosed

**Table 4.** Factors influencing final value of haemoglobin during follow-up in inflammatory bowel disease patients.

|                                                  | Crohn's disease                |                                | Ulcerative colitis             |                                |
|--------------------------------------------------|--------------------------------|--------------------------------|--------------------------------|--------------------------------|
|                                                  | Adjusted mean HgB <sup>a</sup> | Adjusted mean HgB <sup>b</sup> | Adjusted mean HgB <sup>a</sup> | Adjusted mean HgB <sup>b</sup> |
| No. of patients                                  | 569                            | 686                            | 801                            | 1,021                          |
| No. of samples                                   | -                              | 2688                           | -                              | 3,563                          |
| Gender                                           |                                |                                |                                |                                |
| Female                                           | 8.1*                           | 8.0*                           | 8.2*                           | 8.1*                           |
| Male [reference]                                 | 8.8                            | 8.7                            | 8.9                            | 8.9                            |
| Region                                           |                                |                                |                                |                                |
| Eastern Europe                                   | 8.4                            | 8.3                            | 8.4*                           | 8.3*                           |
| Western Europe [reference]                       | 8.5                            | 8.4                            | 8.6                            | 8.6                            |
| Smoking status                                   |                                |                                |                                |                                |
| Current                                          | 8.5                            | 8.4                            | 8.9*                           | 8.7*                           |
| Former                                           | 8.3                            | 8.3                            | 8.6                            | 8.5                            |
| Never [reference]                                | 8.5                            | 8.5                            | 8.5                            | 8.5                            |
| Extra-intestinal manifestation                   |                                |                                |                                |                                |
| No                                               | 8.5                            | 8.4                            | 8.6                            | 8.5                            |
| Yes [reference]                                  | 8.4                            | 8.3                            | 8.5                            | 8.4                            |
| Disease behaviour ± perianal                     |                                |                                |                                |                                |
| B3: penetrating                                  | 8.4                            | 8.3                            | -                              | -                              |
| B2: stricturing                                  | 8.3*                           | 8.2*                           |                                |                                |
| B1: non-stricturing, non-penetrating [reference] | 8.5                            | 8.5                            |                                |                                |
| Disease location                                 |                                |                                |                                |                                |
| L4: Upper GI [± L1-L3]                           | 8.5                            | 8.5                            |                                |                                |
| L3: Terminal ileum + colon                       | 8.4                            | 8.4*                           | -                              | -                              |
| L2: Colon                                        | 8.3*                           | 8.2*                           |                                |                                |
| L1: Terminal ileum [reference]                   | 8.6                            | 8.6                            |                                |                                |
| Disease extent                                   |                                |                                |                                |                                |
| E3: Extensive colitis                            |                                |                                | 8.6                            | 8.4*                           |
| E2: Left-sided                                   | -                              | -                              | 8.6                            | 8.5*                           |
| E1: Proctitis [reference]                        |                                |                                | 8.6                            | 8.7                            |
| Highest treatment level                          |                                |                                |                                |                                |
| No treatment                                     | 8.7                            | 8.6*                           | 9.1*                           | 9.2*                           |
| 5-aminosalicylates                               | 8.7                            | 8.7*                           | 8.7*                           | 8.7*                           |
| Corticosteroids                                  | 8.4                            | 8.4                            | 8.6*                           | 8.5*                           |
| Immunomodulators                                 | 8.3                            | 8.3                            | 8.2                            | 8.1*                           |
| Biological therapy                               | 8.6                            | 8.4*                           | 8.3                            | 8.1*                           |
| Surgery [reference]                              | 8.4                            | 8.1                            | 7.8                            | 7.6                            |

GI, gastrointestinal.

<sup>a</sup>ANCOVA [analysis of covariance] for final haemoglobin value in measurements taken more than 6 months after diagnosis.

<sup>b</sup>Repeated measures ANOVA [analysis of variance] including all available haemoglobin values.

\* $p < 0.05$ .

within well-defined geographical areas. Diagnostic criteria, case ascertainment methods, and recorded data were standardised, and patients were thereby made fully comparable. Several measures previously described ensured that all centres collected valid and high quality data.<sup>13</sup> The EpiCom cohort thereby constitutes a unique group of patients diagnosed after the introduction of biological agents and in the era of earlier and more aggressive treatment with immunomodulators or biological agents. The patients represent the natural spectrum of disease severity. The choices of treatment, as well as of monitoring of anaemia status, reflect community practices; however, they were implemented with a knowledge of the consensus of the European Crohn's and Colitis Organisation.

This study's limitations include the heterogeneity of the participating centres in terms of the health care systems of which they form a part. Decisions regarding treatment and follow-up are strongly linked to extra-medical considerations, and therefore the differences observed between Eastern and Western Europe might be explained by variations between health care systems across the continent. Furthermore, as the cohort represents real-life practices

and no guidance for anaemia screening was provided specifically for this study, not all patients had HgB values or full anaemia work-ups available. Prevalence rates at diagnosis and at 1-year follow-up are influenced by the fact that patients with mild or no symptoms, or mild disease course, were to a lesser extent included in the analysis compared with those with more severe disease. Unfortunately we did not have data regarding iron treatment available, and the prevalence rates of anaemia in the relevant background populations were not collected for comparison. Finally, clinical data were collected only after diagnosis, and so data from patients monitored before diagnosis were not recorded for this study but might have influenced the decision on how to screen follow-up patients.

To conclude, in this European prospective population-based inception cohort the prevalence of anaemia at diagnosis and during the first year of disease was found to be high, with 42% of patients having at least one instance of anaemia. Patients are assessed for anaemia frequently during the first year after a diagnosis of IBD; however, a full anaemia work-up is frequently neglected.



## Funding

Unrestricted grant support has been received from the Kirsten og Freddy Johansens fond. The study sponsor made no contributions to the study design, analysis, data interpretation, or publication.

## Conflict of Interest

JB: lecture fees from AbbVie, Takeda, and MSD; consulting fees from AbbVie, Celgene, and Janssen. DD: lecture fees from AbbVie and Takeda; consulting fee from Janssen. RS: lecture fees from AbbVie, Takeda, and MSD. VA: consulting fees from MSD and Jansen. JFD: lecture fees from AbbVie, Takeda, MSD, and Pharmacosmos. All other authors reported no conflicts of interest.

## Acknowledgments

We are grateful for the work in recruitment and collecting patient data of Alexandros Skamnelos [Greece], Dimitrios Politis [Greece], Ulla-Britt Widen [Sweden], Gediminas Kiudelis [Lithuania], Irena Valantiene [Lithuania], Claus Aalykke [Denmark], Katherine Ashton [UK], Emma Whitehead [UK], Giulia Girardin [Italy], Renata D'Inca [Italy], Lotta Granberg, [Sweden], Benoît Almer [Sweden], Vicent Hernandez [Spain], Amalia Carmona [Spain], Laszlo Lakatos [Hungary], Peterne Demenyi [Hungary], Anastasia Nicolaou [Cyprus], and Petra Weimers [Denmark].

## Author Contributions

All authors have participated in the study design, patient inclusion, and data acquisition, have critically reviewed the draft manuscript for content, and approved the final version for publication. JB had full access to all the data in the study and takes full responsibility for the veracity of the data and statistical analyses. JB, LUG, MH, JFD, and PM analysed and interpreted the data. JB drafted the manuscript.

Parts of this work have been presented at ECCO 2016 and UEG Week 2016.

## Supplementary Data

Supplementary data are available at *ECCO-JCC* online.

## References

- Gasche C, Lomer MC, Cavill I, Weiss G. Iron, anaemia, and inflammatory bowel diseases. *Gut* 2004;53:1190–7.
- Bager P, Befrits R, Wikman O, et al. The prevalence of anemia and iron deficiency in IBD outpatients in Scandinavia. *Scand J Gastroenterol* 2011;46:304–9.
- Filmann N, Rey J, Schneeweiss S, et al. Prevalence of anemia in inflammatory bowel diseases in European countries: a systematic review and individual patient data meta-analysis. *Inflamm Bowel Dis* 2014;20:936–45.
- Wells CW, Lewis S, Barton JR, Corbett S. Effects of changes in hemoglobin level on quality of life and cognitive function in inflammatory bowel disease patients. *Inflamm Bowel Dis* 2006;12:123–30.
- Pizzi LT, Weston CM, Goldfarb NI, et al. Impact of chronic conditions on quality of life in patients with inflammatory bowel disease. *Inflamm Bowel Dis* 2006;12:47–52.
- Ershler WB, Chen K, Reyes EB, Dubois R. Economic burden of patients with anemia in selected diseases. *Value Health* 2005;8:629–38.
- Gomollón F, Dignass A, Annesse V, et al.; ECCO. Third European evidence-based consensus on the diagnosis and management of Crohn's disease 2016: Part 1: diagnosis and medical management. *J Crohns Colitis* 2017;11:3–25.
- Magro F, Gionchetti P, Eliakim R, et al. Third European evidence-based consensus on diagnosis and management of ulcerative colitis. Part 1: definitions, diagnosis, extra-intestinal manifestations, pregnancy, cancer surveillance, surgery, and ileo-anal pouch disorders. *J Crohns Colitis* 2017;11:649–70.
- Høivik ML, Reinisch W, Cvanarova M, Moum B; IBSEN study group. Anaemia in inflammatory bowel disease: a population-based 10-year follow-up. *Aliment Pharmacol Ther* 2014;39:69–76.
- Sjöberg D, Holmström T, Larsson M, Nielsen AL, Holmquist L, Rönnblom A. Anemia in a population-based IBD cohort [ICURE]: still high prevalence after 1 year, especially among pediatric patients. *Inflamm Bowel Dis* 2014;20:2266–70.
- Ott C, Liebold A, Taksas A, Strauch UG, Obermeier F. High prevalence but insufficient treatment of iron-deficiency anemia in patients with inflammatory bowel disease: results of a population-based cohort. *Gastroenterol Res Pract* 2012;2012:595970.
- Burisch J. Crohn's disease and ulcerative colitis. Occurrence, course and prognosis during the first year of disease in a European population-based inception cohort. *Dan Med J* 2014;61:B4778.
- Burisch J, Pedersen N, Čuković-Cavka S, et al.; EpiCom-group. East-West gradient in the incidence of inflammatory bowel disease in Europe: the ECCO-EpiCom inception cohort. *Gut* 2014;63:588–97.
- Vegh Z, Burisch J, Pedersen N, et al. Incidence and initial disease course of inflammatory bowel diseases in 2011 in Europe and Australia: Results of the 2011 ECCO-EpiCom inception cohort. *J Crohns Colitis* 2014;8:1506–15.
- Burisch J, Pedersen N, Cukovic-Cavka S, et al.; EpiCom Group. Initial disease course and treatment in an inflammatory bowel disease inception cohort in Europe: the ECCO-EpiCom cohort. *Inflamm Bowel Dis* 2014;20:36–46.
- Vegh Z, Burisch J, Pedersen N, et al. Treatment steps, surgery, and hospitalization rates during the first year of follow-up in patients with inflammatory bowel diseases from the 2011 ECCO-EpiCom Inception Cohort. *J Crohns Colitis* 2015;9:747–53.
- Munkholm P. Crohn's disease—occurrence, course and prognosis. An epidemiologic cohort-study. *Dan Med Bull* 1997;44:287–302.
- Langholz E. Ulcerative colitis. An epidemiological study based on a regional inception cohort, with special reference to disease course and prognosis. *Dan Med Bull* 1999;46:400–15.
- Vind I, Riis L, Jess T, et al. Increasing incidences of inflammatory bowel disease and decreasing surgery rates in Copenhagen City and County, 2003–2005: A population-based study from the Danish Crohn Colitis database. *Am J Gastroenterol* 2006;101:1274–82.
- Silverberg MS, Satsangi J, Ahmad T, et al. Toward an integrated clinical, molecular and serological classification of inflammatory bowel disease: report of a Working Party of the 2005 Montreal World Congress of Gastroenterology. *Can J Gastroenterol* 2005;19[Suppl A]:5–36A.
- Burisch J, Cukovic-Cavka S, Kaimakliotis I, et al. Construction and validation of a web-based epidemiological database for inflammatory bowel diseases in Europe An EpiCom study. *J Crohns Colitis* 2011;5:342–9.
- World Health Organization. *Iron Deficiency Anemia: Assessment, Prevention and Control. Report of a Joint WHO/UNICEF/UNU Consultation*. Geneva: WHO; 1998.
- Dignass AU, Gasche C, Bettenworth D, et al.; European Crohn's and Colitis Organisation [ECCO]. European consensus on the diagnosis and management of iron deficiency and anaemia in inflammatory bowel diseases. *J Crohns Colitis* 2015;9:211–22.
- Wilson A, Reyes E, Ofman J. Prevalence and outcomes of anemia in inflammatory bowel disease: a systematic review of the literature. *Am J Med* 2004;116[Suppl]:44–9S.
- Bager P, Befrits R, Wikman O, et al. High burden of iron deficiency and different types of anemia in inflammatory bowel disease outpatients in Scandinavia: a longitudinal 2-year follow-up study. *Scand J Gastroenterol* 2013;48:1286–93.
- Rieder F, Paul G, Schnoy E, et al. Hemoglobin and hematocrit levels in the prediction of complicated Crohn's disease behavior—a cohort study. *PLoS One* 2014;9:e104706.
- Herrera-deGuise C, Casellas F, Robles V, Navarro E, Borrull N. Iron deficiency in the absence of anemia impairs the perception of health-related quality of life of patients with inflammatory bowel disease. *Inflamm Bowel Dis* 2016;22:1450–5.
- Koutroubakis IE, Ramos-Rivers C, Regueiro M, et al. Persistent or recurrent anemia is associated with severe and disabling inflammatory bowel disease. *Clin Gastroenterol Hepatol* 2015;13:1760–6.
- Lakatos L, Pandur T, David G, et al. Association of extraintestinal manifestations of inflammatory bowel disease in a province of western Hungary with disease phenotype: results of a 25-year follow-up study. *World J Gastroenterol* 2003;9:2300–7.

**Appendix. Members of the EpiCom study group**

Ola Niewiadomski (Australia)  
 Sally Bell (Australia)  
 Niksa Turk (Croatia)  
 Silvija Cukovic-Cavka (Croatia)  
 Ioannis Kaimakliotis (Cyprus)  
 Anastasia Nicolaou (Cyprus)  
 Dana Duricova (Czech Republic)  
 Milan Lukas (Czech Republic)  
 Martin Bortlík (Czech Republic)  
 Olga Shonová (Czech Republic)  
 Johan Burisch (Denmark)  
 Pia Munkholm (Denmark)  
 Ebbe Langholz (Denmark)  
 Birgitte Blichfeldt (Denmark)  
 Dorte Marker (Denmark)  
 Katrine Carlsen (Denmark)  
 Petra Weimers (Denmark)  
 Natalia Pedersen (Denmark)  
 Jens Kjeldsen (Denmark)  
 Clays Aalykke (Denmark)  
 Jens Frederik Dahlerup (Denmark)  
 Karen Kudsk (Denmark)  
 Vibeke Andersen (Denmark)  
 Ida Vind (Denmark)  
 Niels Thorsgaard (Denmark)  
 Riina Salupere (Estonia)  
 Jóngerð Olsen (Faroe Islands)  
 Kári Rubek Nielsen (Faroe Islands)  
 Pia Oksanen (Finland)  
 Pekka Collin (Finland)  
 Konstantinos H. Katsanos (Greece)  
 Dimitrios K. Christodoulou (Greece)  
 Alexandros Skamnelos (Greece)  
 Dimitrios Politis (Greece)  
 Karin Ladefoged (Greenland)  
 Peter Laszlo Lakatos (Hungary)  
 Zsuzsanna Vegh (Hungary)  
 Laszlo Lakatos (Hungary)  
 Peterne Demenyi (Hungary)  
 Szabina Nemethne Kramli (Hungary)

Colm O'Morain (Ireland)  
 Giualia Dal Piaz (Italy)  
 Alessia Santini (Italy)  
 Giulia Girardin (Italy)  
 Renata D'Inca (Italy)  
 Doron Schwartz (Israel)  
 Selwyn Odes (Israel)  
 Limas Kupcinskas (Lithuania)  
 Laimas Jonaitis (Lithuania)  
 Gediminas Kiudelis (Lithuania)  
 Irena Valantiene (Lithuania)  
 Romanas Zykus (Lithuania)  
 Ruta Kucinskiene (Lithuania)  
 Svetlana Turcan (Moldova)  
 Louisa Barros (Portugal)  
 Fernando Magro (Portugal)  
 Daniela Lazar (Romania)  
 Adrian Goldis (Romania)  
 Inna Nikulina (Russian Federation)  
 Elena Belousova (Russian Federation)  
 Vicent Hernandez (Spain)  
 Luisa de Castro (Spain)  
 Juan-Ramon Pineda (Spain)  
 Santos Pereira (Spain)  
 Jesus Martinez-Cadilla (Spain)  
 Luciano Sanroman (Spain)  
 Montserrat Figueira (Spain)  
 David Martinez Ares (Spain)  
 Jose-Ignacio Rodriguez-Prada (Spain)  
 Alberto Fernandez (Spain)  
 Amalia Carmona (Spain)  
 Carlos Gonzalez-Portela (Spain)  
 Sven Almer (Sweden)  
 Lotta Granberg, (Sweden)  
 Benoît Almer (Sweden),  
 Jonas Halfvarson (Sweden)  
 Ulla-Britt Widen (Sweden)  
 Shaji Sebastian (UK)  
 Sally Myers (UK)  
 Katherine Ashton (UK)  
 Emma whitehead (UK)  
 Naila Arebi (UK)
